# Supplementary material for: Probing the binding and activation of small molecules by gas-phase transition metal clustersviaIR spectroscopy
Source: Royal Society of Chemistry journal article supplement (doi:10.1039/d2cs00104g), 2023-01-01
Supplement: d2cs00104g1.pdf [file d2cs00104g1.pdf]

## Electronic supporting information to

# Probing the Binding and Activation of Small Molecules by Gas-Phase Transition Metal Clusters via IR Spectroscopy

André Fielicke\*<sup>a</sup>

Table S1 Experimental vibrational frequencies (in cm<sup>-1</sup>) of anionic, neutral and cationic gold cluster complexes Au<sub>n</sub>(O<sub>2</sub>)<sub>m</sub><sup>-/0/+</sup>

| <i>n</i> | <i>m</i>              | APES <sup>a,1</sup> | anionic <sup>b, 2</sup> | neutral <sup>c,3</sup>                       | cationic <sup>d,4</sup>                                                      |
|----------|-----------------------|---------------------|-------------------------|----------------------------------------------|------------------------------------------------------------------------------|
| 1        | 1<br>2                |                     | 911.9                   | 1213.6                                       |                                                                              |
| 2        | 1<br>2<br>3           | 1360(70)            |                         |                                              | 1467, 1756; 1503 <sup>e</sup><br>1460, 1756; 1472 <sup>e</sup><br>1443, 1759 |
| 3        | 1<br>2<br>3<br>4      |                     |                         |                                              | 1512<br>1512<br>1514<br>1518, 1730                                           |
| 4        | 1<br>2<br>3<br>4      | 1360(80)            | 1078                    | 1502<br>1508, 1573, 1650<br>1508, 1573, 1650 | 1488<br>1273, 1489, 1722<br>1261; 1487; 1717<br>1236, 1493, 1714             |
| 5        | 1<br>2<br>3<br>4      |                     |                         |                                              | 1516<br>1513<br>1513<br>1515, 1705                                           |
| 6        | 1<br>2                | 1330(100)           | 1081                    |                                              | 1511<br>1515, 1708                                                           |
| 7        | 1<br>2                |                     |                         | 1063, 1528<br>1064, 1528                     | 1521                                                                         |
| 8        | 1<br>2                |                     | 1051, 1067, 1110        |                                              | 1463<br>1446                                                                 |
| 9        | 1                     |                     |                         | 1058                                         |                                                                              |
| 10       | 1<br>2                |                     | 1053                    |                                              | 1068<br>1069, 1530                                                           |
| 11       | 1<br>2                |                     |                         | 1058<br>1058                                 |                                                                              |
| 12       | 1<br>2<br>3<br>4<br>5 |                     | 1053                    |                                              | 1494<br>1051, 1487<br>1064, 1483<br>1064<br>1069                             |
| 14       | 1                     |                     | 1069                    |                                              |                                                                              |
| 18       | 1                     |                     | 1061                    |                                              |                                                                              |
| 20       | 1                     |                     | 1068                    |                                              |                                                                              |
| 21       | 1<br>3                |                     |                         | 1069                                         | 1067, 1376                                                                   |
| 22       | 1                     |                     |                         |                                              | 874, 1063, 1359                                                              |

<sup>a</sup> vibrational data for the neutral species in the structure of the anion; <sup>b</sup> data from IR-MPD, original tabulated values are corrected by a factor of 1.0075 for the calibration of the IR laser frequency that had been initially erroneously ignored; estimated accuracy  $\pm 3$  cm<sup>-1</sup>, except for *n*=1 that is from Ne matrix IR spectroscopy Ref. <sup>5</sup>; <sup>c</sup> data from IR-MPD with an estimated accuracy of  $\pm 3$  cm<sup>-1</sup>, except for *n*=1 that is from Ne matrix IR spectroscopy Ref. <sup>5</sup>; <sup>d</sup> data from IR-MPD with an estimated accuracy of  $\pm 10$  cm<sup>-1</sup>, reanalyzed original data; <sup>e</sup> Ref. <sup>6</sup> reports for Au<sub>2</sub>(O<sub>2</sub>)<sub>*n*</sub><sup>+</sup> (*n*=1,2) slightly higher values compared to Ref.<sup>4b</sup>. While the deviation for *n*=2 probably reflects the experimental (calibration) accuracy of IR-MPD using IR-FELs, the larger discrepancy for *n*=1 may be due to fragmentation of larger complexes affecting the shape and position of the depletion peak although the authors of ref. <sup>6</sup> took precautions to avoid such distortions.

## References

1. W. Huang, H.-J. Zhai and L.-S. Wang, *J. Am. Chem. Soc.*, 2010, **132**, 4344-4351.
2. A. P. Woodham, G. Meijer and A. Fielicke, *Angew. Chem. Int. Ed.*, 2012, **51**, 4444-4447.
3. A. P. Woodham, G. Meijer and A. Fielicke, *J. Am. Chem. Soc.*, 2013, **135**, 1727-1730.
4. a) A. P. Woodham and A. Fielicke, *Angew. Chem. Int. Ed.*, 2014, **53**, 6554-6557; b) A. P. Woodham, PhD thesis, Technische Universität Berlin, 2014.
5. X. Wang and L. Andrews, *J. Phys. Chem. A*, 2001, **105**, 5812-5822.
6. S. M. Lang, T. M. Bernhardt, J. M. Bakker, B. Yoon and U. Landman, *J. Am. Soc. Mass Spectrom.*, 2019, **30**, 1895-1905.
